# Supplementary material
Source: MDPI journal article supplement (https://www.mdpi.com/2073-4395/14/5/1062)
Supplement: s1 [file s1 › agronomy-2957078-supplementary.pdf]

**Table S1.** *Micromonospora* strains used in this study

| <b>Bacterial strain</b>                        | <b>Origin (country)</b> |
|------------------------------------------------|-------------------------|
| <i>Micromonospora alfalfae</i> 50              | South Africa            |
| <i>Micromonospora alfalfae</i> 53              | South Africa            |
| <i>Micromonospora alfalfae</i> 55              | South Africa            |
| <i>Micromonospora inaquosa</i> 30              | South Africa            |
| <i>Micromonospora inaquosa</i> 33              | South Africa            |
| <i>Micromonospora inaquosa</i> 152             | South Africa            |
| <i>Micromonospora inaquosa</i> 230             | South Africa            |
| <i>Micromonospora inaquosa</i> N2              | South Africa            |
| <i>Micromonospora purpureochromogenes</i> N5   | South Africa            |
| <i>Micromonospora tulbaghia</i> 48             | South Africa            |
| <i>Micromonospora tulbaghia</i> N4             | South Africa            |
| <i>Micromonospora violae</i> 29                | South Africa            |
| <i>Micromonospora violae</i> 43                | South Africa            |
| <i>Micromonospora violae</i> 45                | South Africa            |
| <i>Micromonospora violae</i> 66                | South Africa            |
| <i>Micromonospora violae</i> 126               | South Africa            |
| <i>Micromonospora violae</i> 249               | South Africa            |
|                                                |                         |
| <i>Micromonospora lupini</i> 5052              | Poland                  |
| <i>Micromonospora purpureochromogenes</i> 5056 | Poland                  |

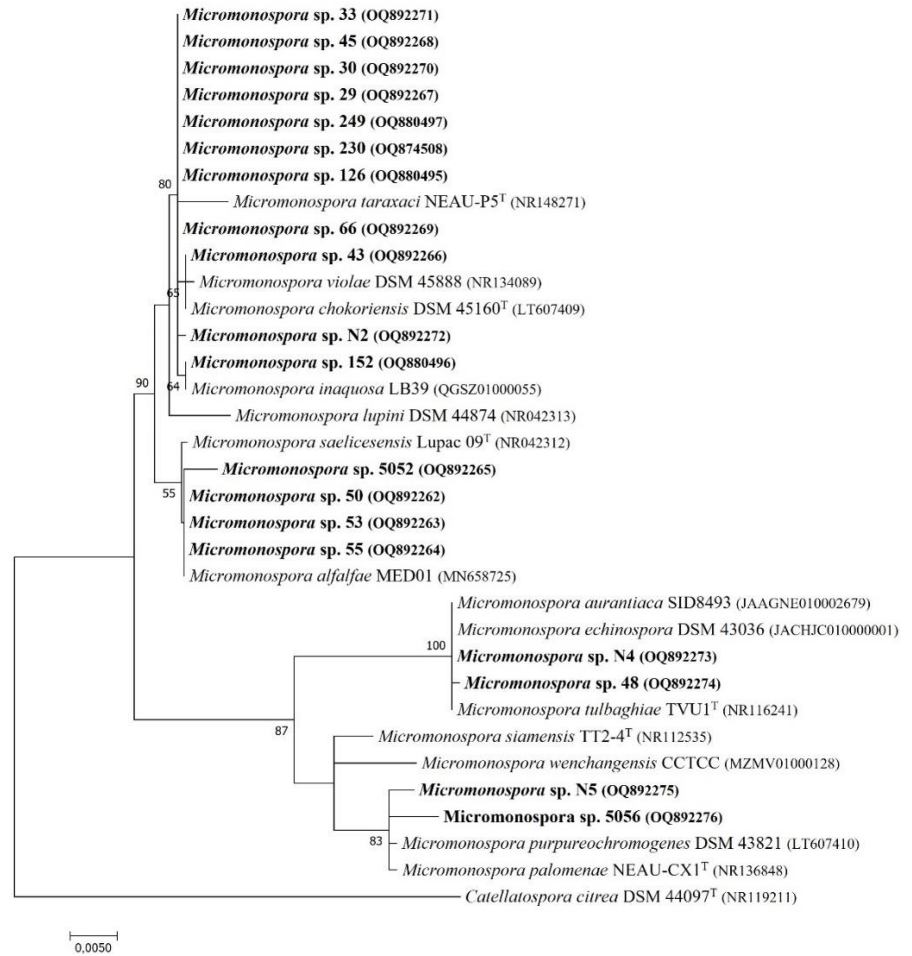

**Figure S1.** The maximum-likelihood phylogenetic tree of 16S rRNA gene fragments of the nineteen endophytic isolates and fourteen most closely related taxa was constructed using the Tamura-Nei model [49]. Discrete Gamma (+G) distribution was used to model evolutionary rate differences among sites and the rate variation model allowed some sites to be evolutionarily invariant (+I). Bootstrap values [%] higher than 50 are shown next to the branches. The scale bar represents 0.005 substitutions per nucleotide position.

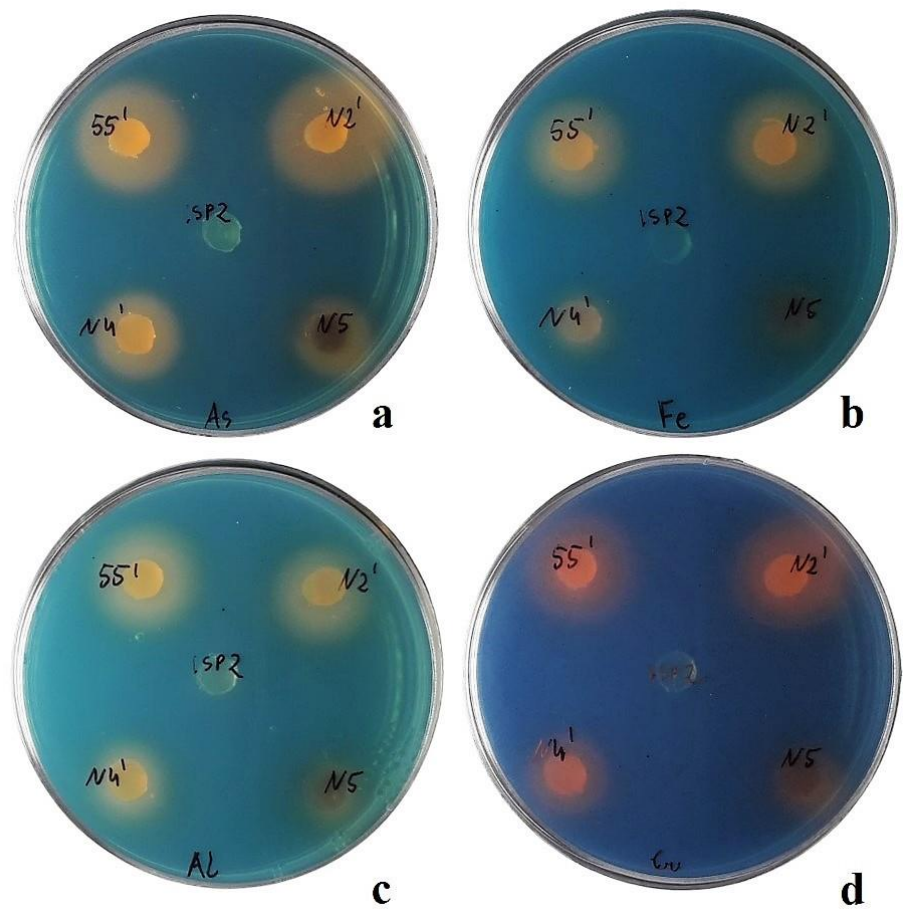

**Figure S2.** Production of metallophores - sterile ISP2 agar plugs placed in the centre were used as a negative control (no halo).
